# Supplementary material for: Lipid zonation and phospholipid remodeling in nonalcoholic fatty liver disease
Source: PubMed Central journal article supplement (PMC5396354; doi:10.1002/hep.28953), 2017-02-06
Supplement: HEP-65-1165-s001.pdf [file HEP-65-1165-s001.pdf]

## Supporting Information - HEP-16-0510

### Lipid zonation and phospholipid remodeling in non-alcoholic fatty liver disease

Zoe Hall<sup>1,2</sup>, Nicholas J. Bond<sup>2</sup>, Tom Ashmore<sup>1</sup>, Francis Sanders<sup>2</sup>, Zsuzsanna Ament<sup>2</sup>, Xinzhu Wang<sup>1</sup>, Andrew J. Murray<sup>3</sup>, Elena Bellafante<sup>4</sup>, Sam Virtue<sup>5</sup>, Antonio Vidal-Puig<sup>5</sup>, Michael Allison<sup>6</sup>, Susan E. Davies<sup>7</sup>, Albert Koulman<sup>2</sup>, Michele Vacca<sup>1, 2, 5</sup>, Julian L. Griffin<sup>1,2,\*</sup>

<sup>1</sup>Department of Biochemistry and Cambridge Systems Biology Centre, University of Cambridge, 80 Tennis Court Road, Cambridge, UK

<sup>2</sup>MRC Human Nutrition Research, 120 Fulbourn Road, Cambridge, UK

<sup>3</sup>Department of Physiology, Development and Neuroscience, University of Cambridge, Downing Street, Cambridge, UK

<sup>4</sup>Mario Negri Sud, Santa Maria Imbaro, Chieti, Italy

<sup>5</sup>Metabolic Research Laboratories, Wellcome Trust-MRC Institute of Metabolic Science, Addenbrooke's Hospital, University of Cambridge, UK

<sup>6</sup>Liver Unit, Department of Medicine, Cambridge University Hospitals NHS Foundation Trust, Cambridge, UK

<sup>7</sup>Department of Histopathology, Cambridge University Hospitals NHS Foundation Trust, Cambridge, UK

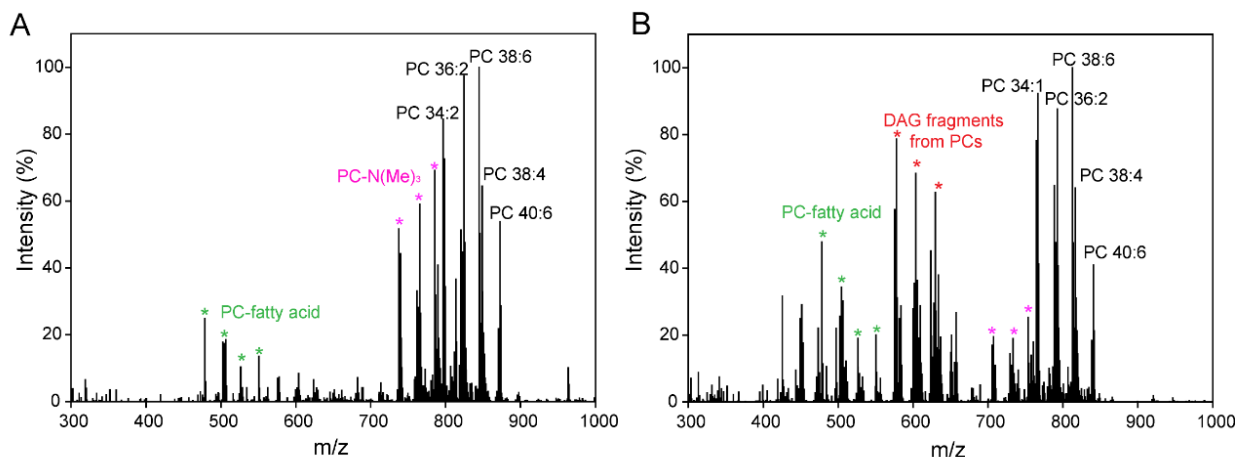

**Figure S1. Representative average MALDI-MSI spectra.** A typical mass spectrum for mouse liver tissue with potassium nitrate (A) or lithium nitrate wash (B). Spectra are predominantly characterised by the corresponding  $K^+$  or  $Li^+$  phosphatidylcholine adducts, and their in-source fragment ions (green, pink and red asterisks).  $Li^+$  adducts are more prone to fragmentation, and hence useful for identification of lipids by tandem MS.

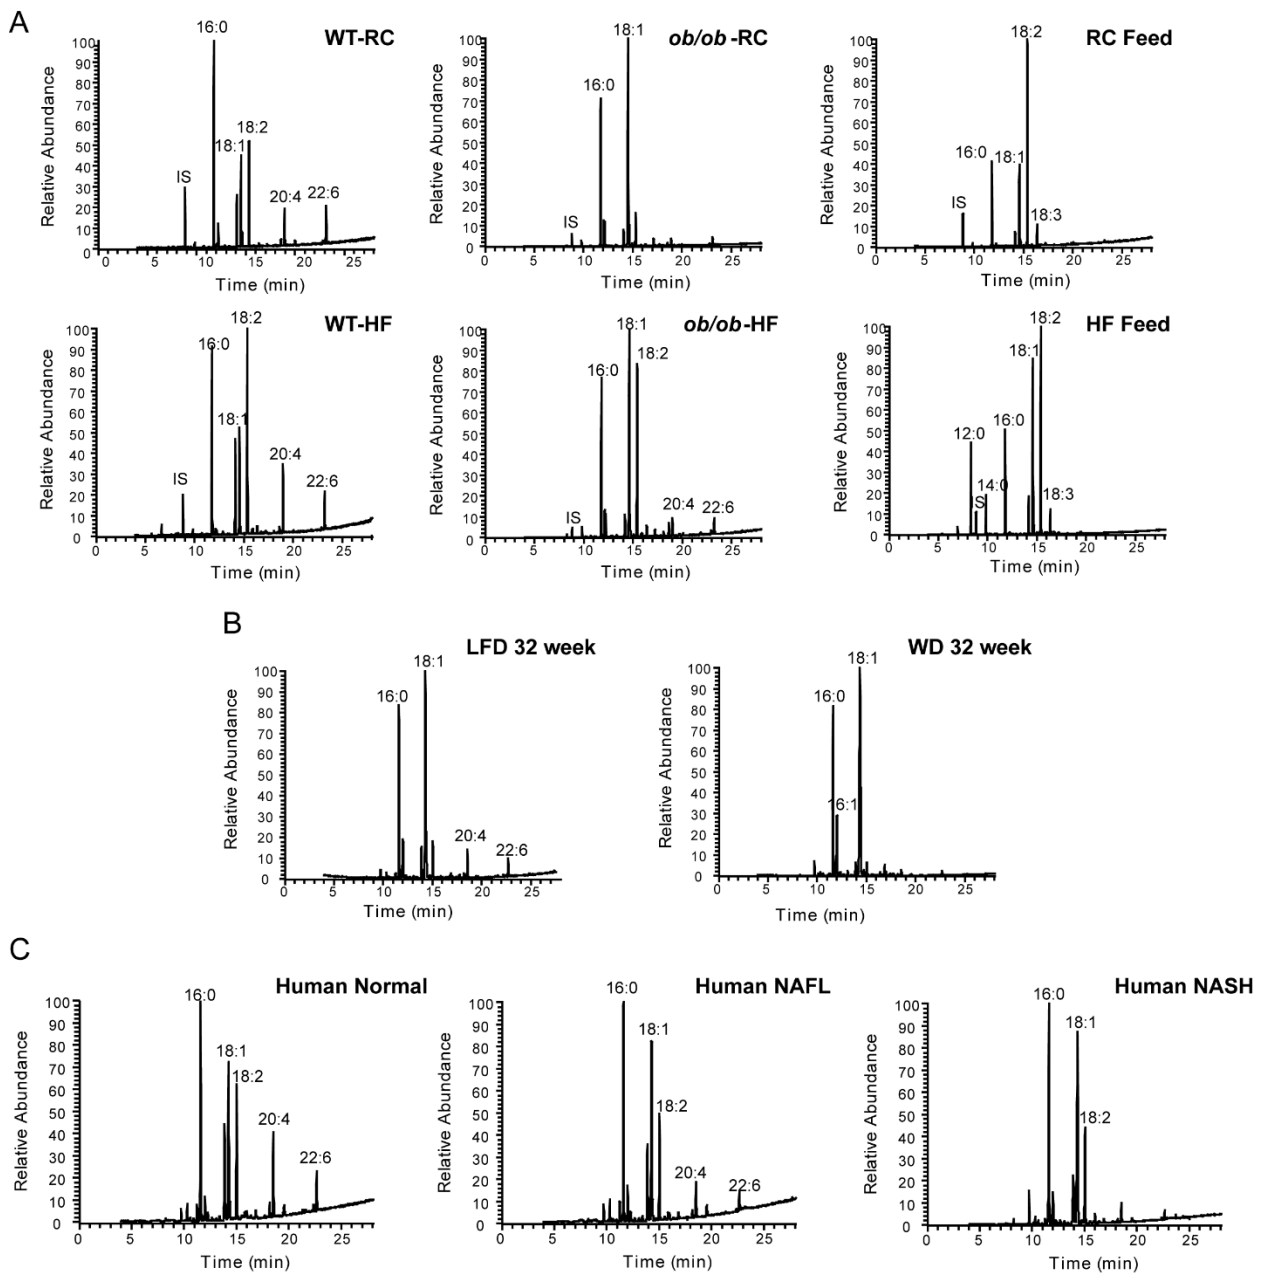

**Figure S2. Representative GC-MS chromatograms.** Total fatty acids (FAMES) were compared for wild type (WT) and *ob/ob* mice fed a high fat (HF) or regular chow (RC) diet, and compared to their respective feeds (**A**). Total fatty acid profiles for WT mice on a Western diet (WD) or low fat diet (LFD) after 32 weeks feeding (**B**). Example GC-MS fatty acid profiles for human samples (**C**). Full results are in Table S4.

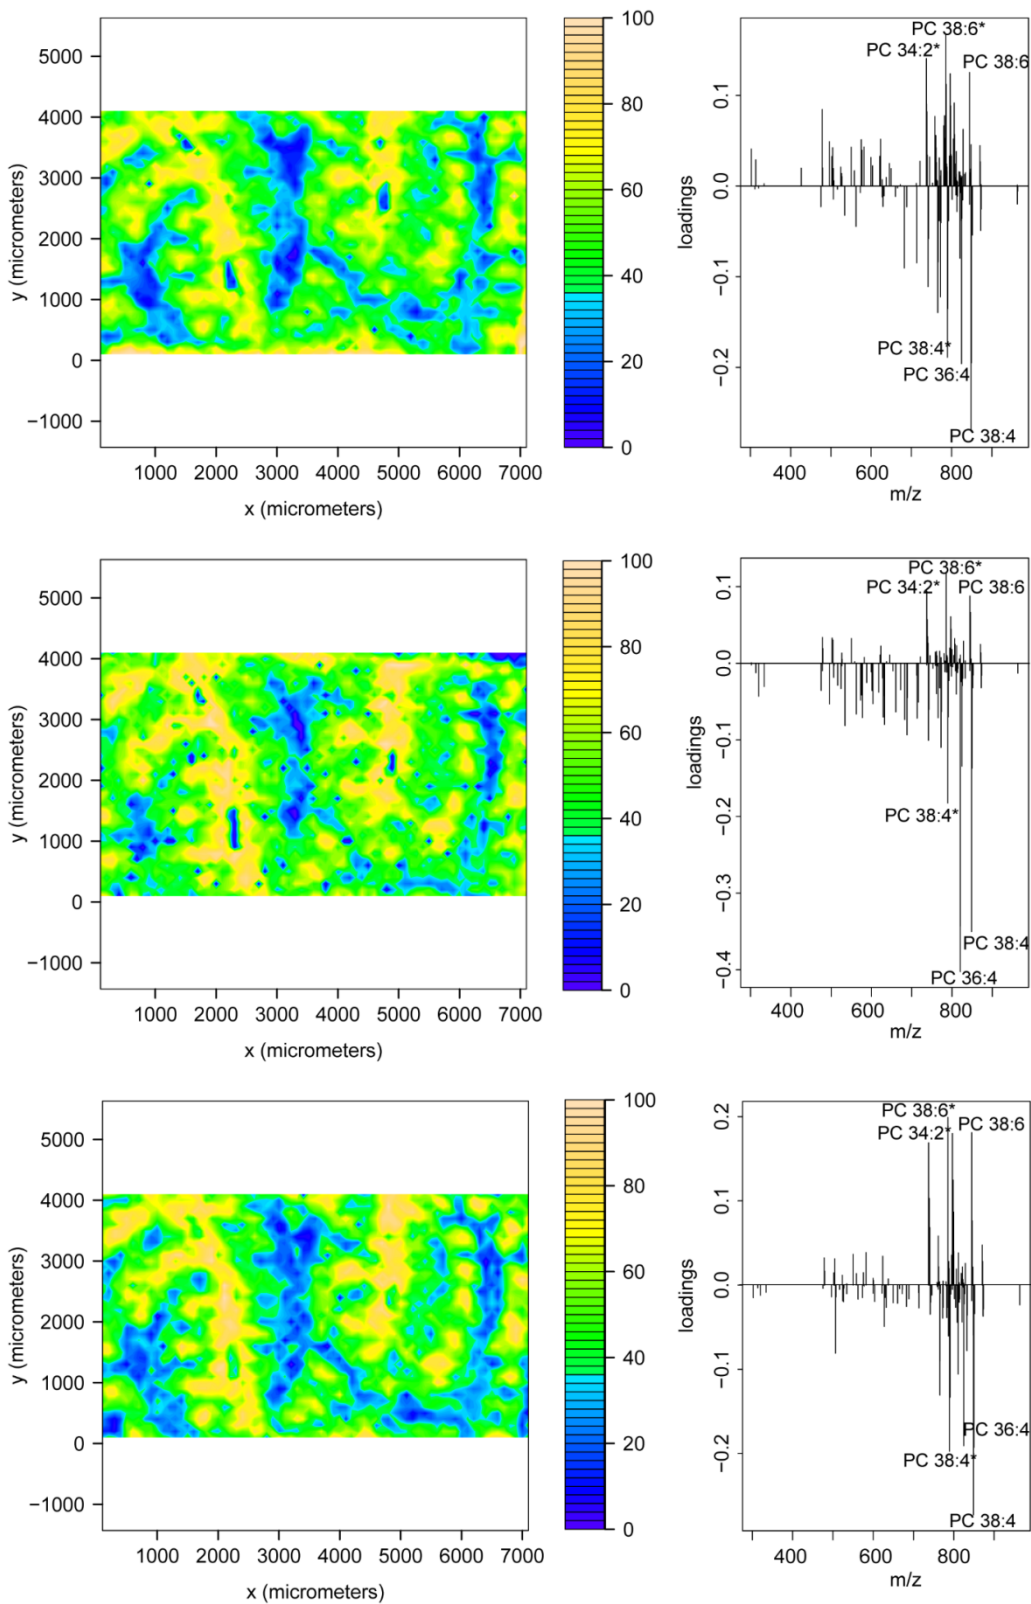

**Figure S3. Assessing method reproducibility.** We measured the zonal distribution of lipids using MALDI-MSI across serial sections of *ob/ob*-RC liver, finding excellent agreement in zonation distributions of lipids and their relative loadings scores. Species annotated with asterisk have been identified as fragments of intact lipids.

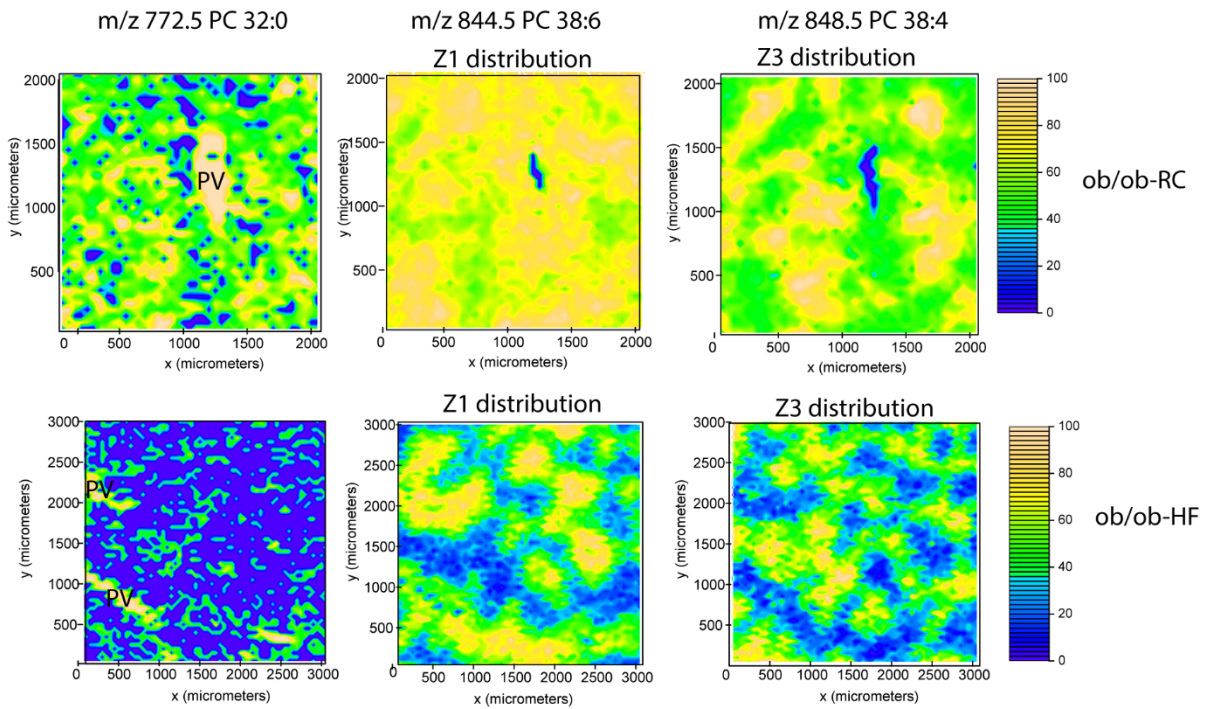

**Figure S4. Zonal distributions of key lipid across liver tissue measured by MALDI-MSI for *ob/ob*-RC and *ob/ob*-HF mice.** PC(32:0) is associated with the portal vein, whereas PC(38:6) and PC(38:4) have predominantly zone 1 and zone 3 distributions respectively. High similarity between the two groups was observed in terms of lipid zonation.

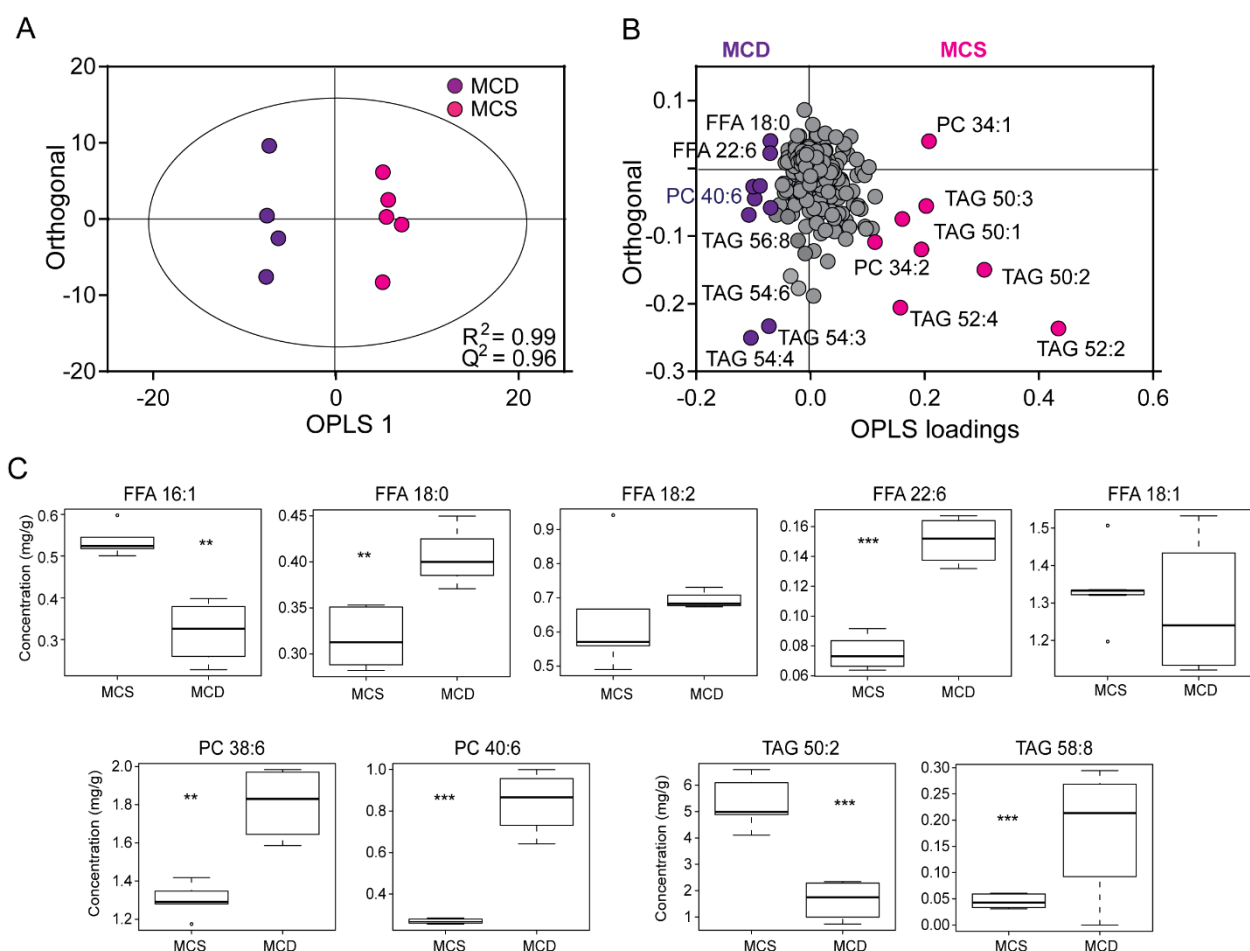

**Figure S5. Hepatic lipid signatures for MCD diet mice.** We analysed liver tissue by LC-MS from mice on methionine choline deficient (MCD) and methionine choline sufficient (MCS) control diets. We determined that the main differences were arising from increased PUFA content in MCD mice – specifically lipids containing 22:6 (PC(38:6); PC(40:6); TAG(58:8)) and free fatty acid 22:6. There was no difference found for free 18:1 – proposed as a marker for NAFL and NASH. The lipid profile for the MCD mice was highly dissimilar to that observed for the other two mouse studies (high fat diet; Western diet), and from the clinical samples with either NAFL or NASH diagnosis. We therefore concluded that the MCD diet was not suitable for studying lipid profile changes representative of human NASH. This may be a result of lipolysis of adipose tissue, which is a potential effect of the MCD diet resulting in loss of body weight. This could consequently alter the hepatic lipid profile through the increased circulation of PUFA from adipose tissue (1). Additionally, the MCD diet by its nature directly affects the metabolism of phosphatidylcholine lipids (since there is a deficiency of choline) and this again may render it unsuitable for a lipidomic study. In contrast, feeding mice with a Western diet for 32 weeks resulted in mice with NASH and metabolic features matching human NASH (increased body weight, insulin resistance, increased 18:1 and shorter chain TAGs).

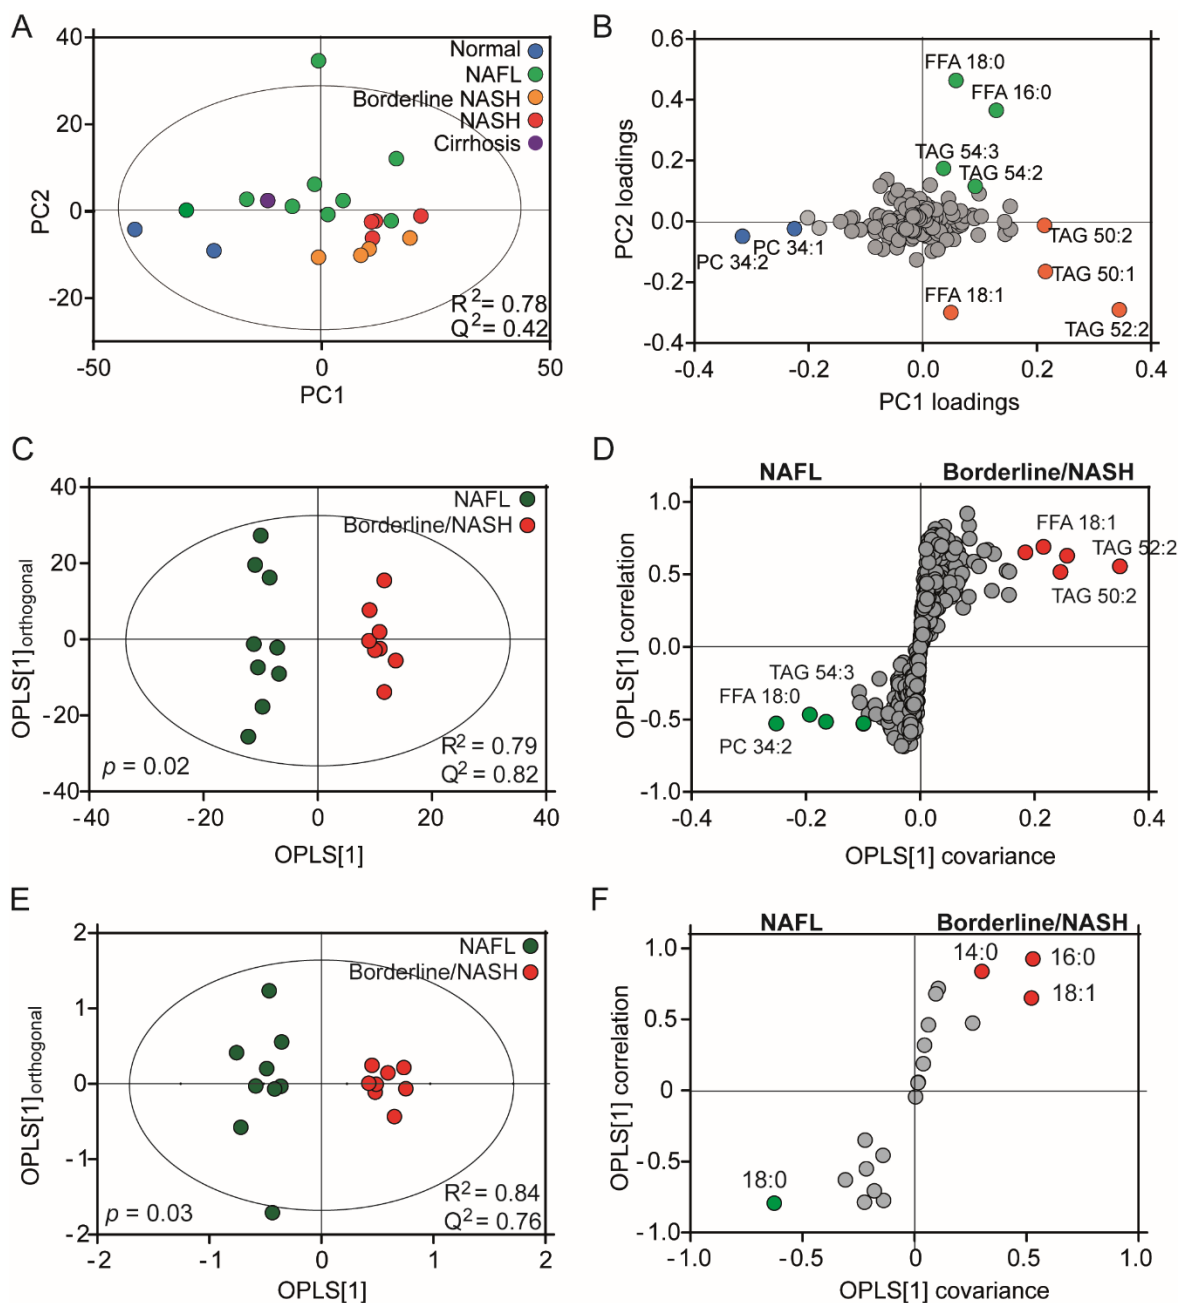

**Figure S6. Lipid signatures in liver tissue change with human NAFLD progression.** LC-MS was used to compare the lipid profiles across samples, and a PCA model constructed (A), which clearly distinguishes liver tissue with borderline NASH/NASH from the other samples principally based on increased FFA(18:1) and TAGs with shorter fatty acid chains, e.g. TAG(52:2) (16:0/18:1/18:1) (B). An OPLS-DA model (C) was built to compare NAFL with NASH liver. From the OPLS-DA model, an S-plot (D) was constructed (2), which combines the modelled covariance and modelled correlation from the OPLS-DA model in a scatter plot. This enabled the determination of the most important and reliable lipid species for distinguishing the two groups (right upper and left lower quadrants for NASH and NAFL tissue respectively). Similarly GC-MS analysis on total fatty acid profiles revealed an increase in *de novo* lipogenesis products 16:0 and 14:0 and MUFA 18:1 in NASH compared to NAFL (E-F).

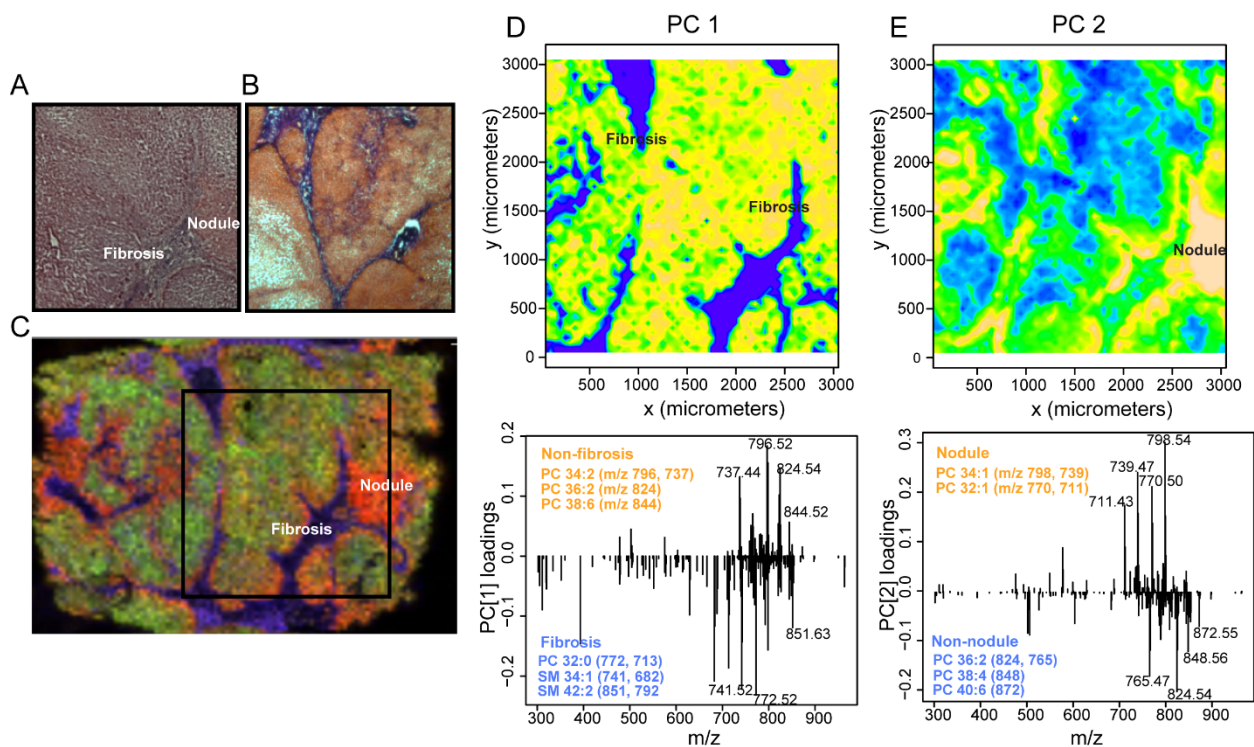

**Figure S7. Principal components analysis (PCA) of cirrhotic human liver tissue.** Sections of liver tissue with cirrhosis are shown stained with H&E (A) or Masson's trichrome stain (B), in which fibrosis is stained blue. Two-dimensional ion distributions obtained by MALDI-MSI are shown (C) for PC(32:0)  $K^+$  ( $m/z$  772.52, blue), PC(34:1)  $K^+$  ( $m/z$  798.54, red) and PC(34:2)  $K^+$  ( $m/z$  796.52, green). PCA scores and loadings plots are given for the first two principal components (D, E). Yellow and blue in contour plots represent most positive and negative scores, respectively, corresponding to non-fibrotic and fibrotic regions (D) and nodule and non-nodule regions (E). Fibrotic regions are characterised by increased SM lipids and PC 32:0, whereas the nodular area has increased PC 34:1 and PC 32:1.



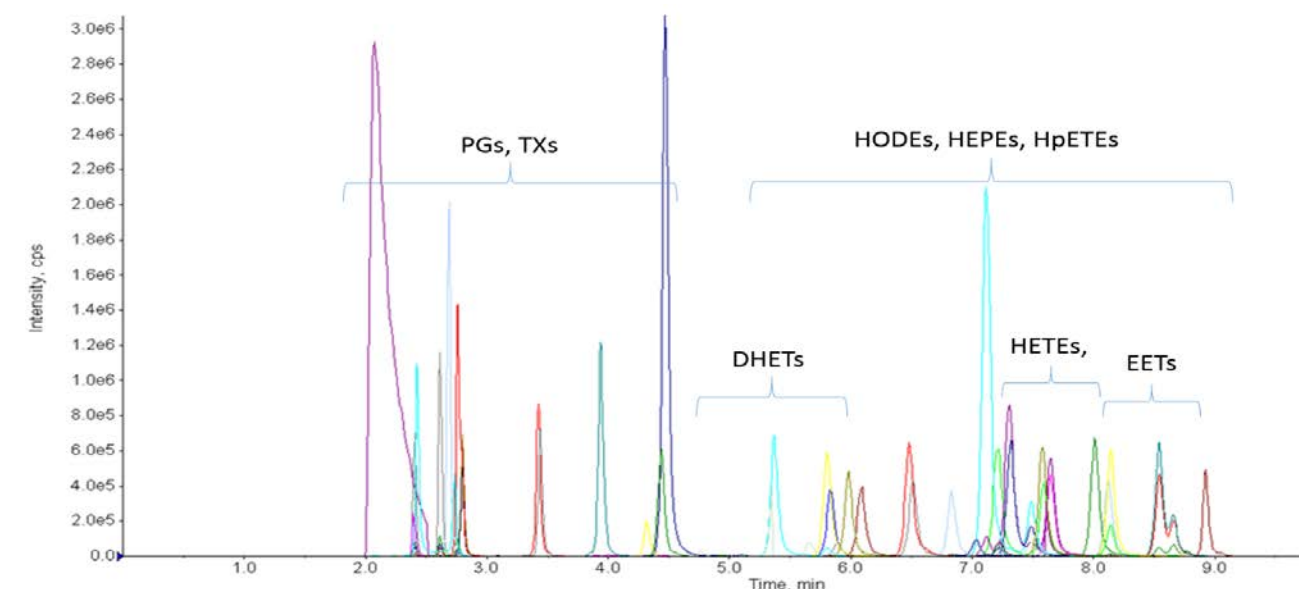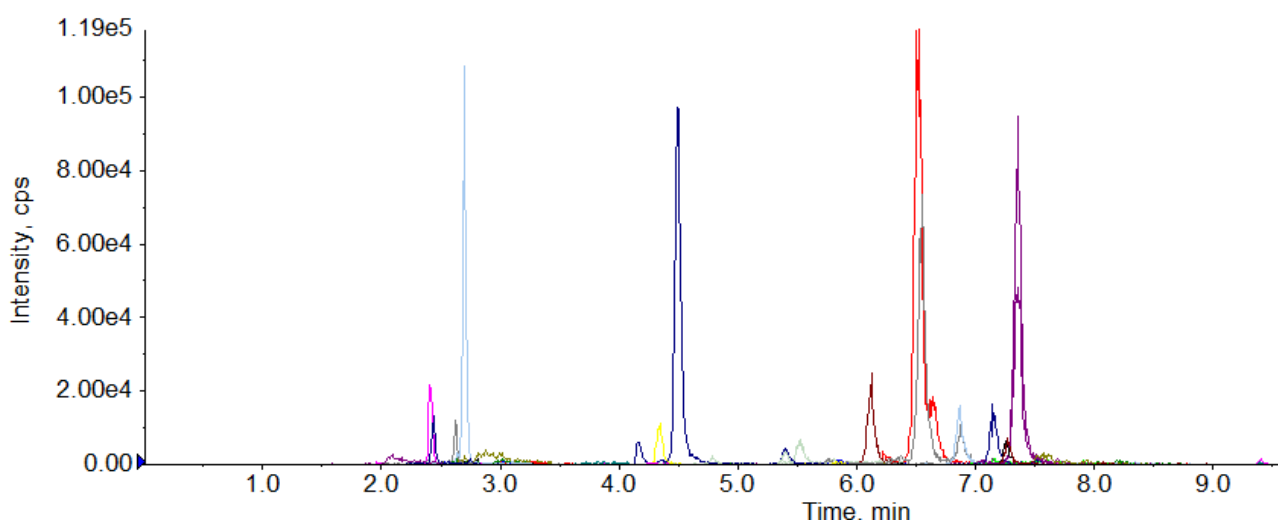

**Figure S8. Extracted multiple reaction monitoring (MRM) chromatograms for standard mix (100 nM) of eicosanoids (top) and typical mouse liver sample with NAFL (bottom).** Region of chromatographic elution for major classes of eicosanoids are highlighted for prostaglandins (PGs), thromboxanes (TXs), dihydroxyeicosatrienoic acids (DHETs), hydroxyeicosatetraenoic acids (HETEs), epoxyeicosatrienoic acids (EETs), hydroxyoctadienoic acids (HODEs), hydroxyeicosapentaenoic acids (HEPEs), hydroperoxy-eicosatetraenoic acids (HpETEs).

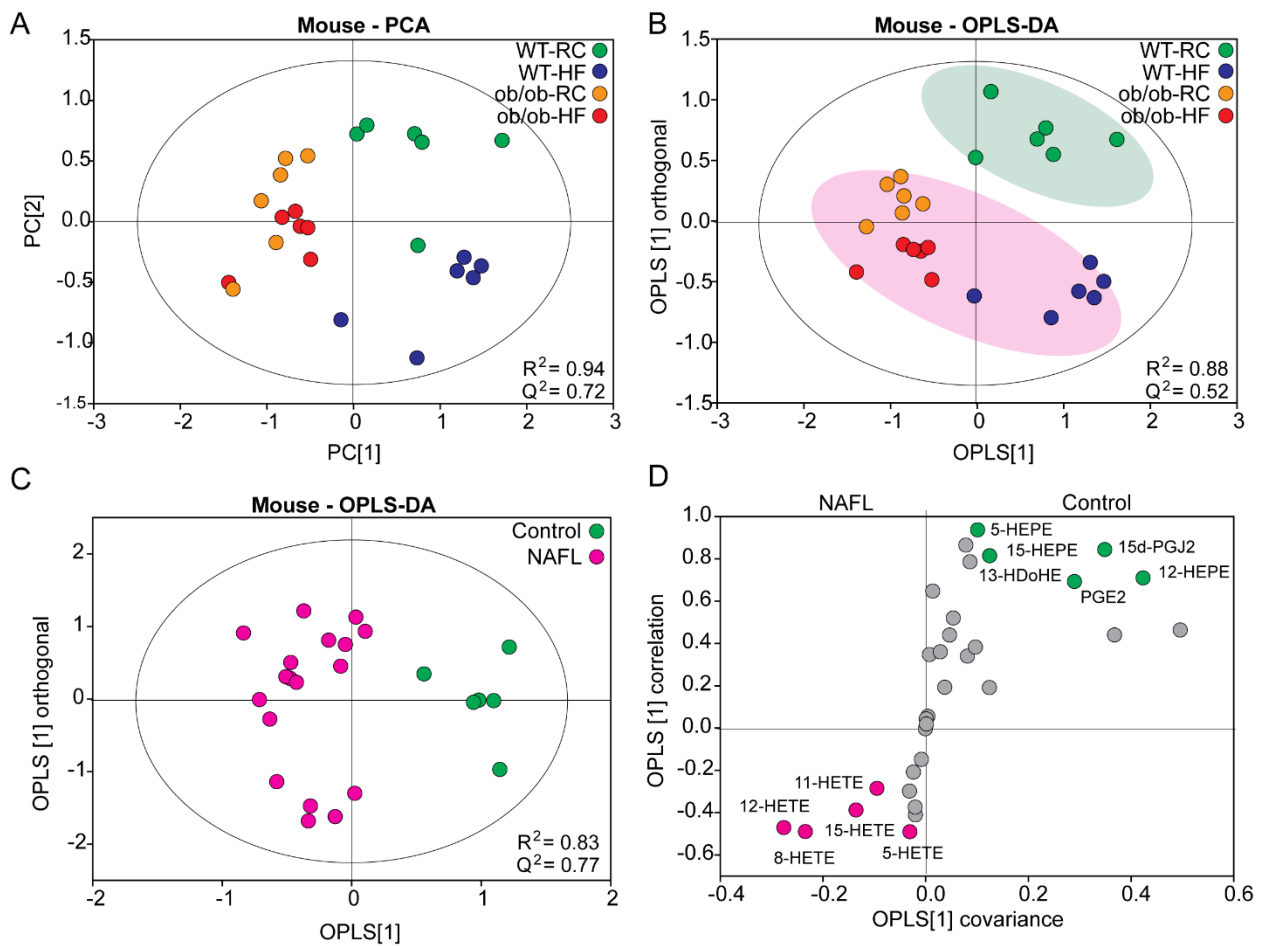

**Figure S9. Eicosanoid profiles in murine NAFL.** Eicosanoids were measured in homogenised mouse liver and eicosanoids profiles used to construct PCA (A) and OPLS-DA models (B). Of particular interest was the major differences in eicosanoids between control (n=5) and NAFL (n=15) liver tissue (C). Using this model, we constructed an S-plot, which combines the modelled covariance and modelled correlation from the OPLS-DA model in a scatter plot (D). This enabled the determination of the most important and reliable eicosanoid species for distinguishing the two groups (right upper and left lower quadrants for control and NAFL tissue respectively).

### Macrophage staining (CD68) x 50

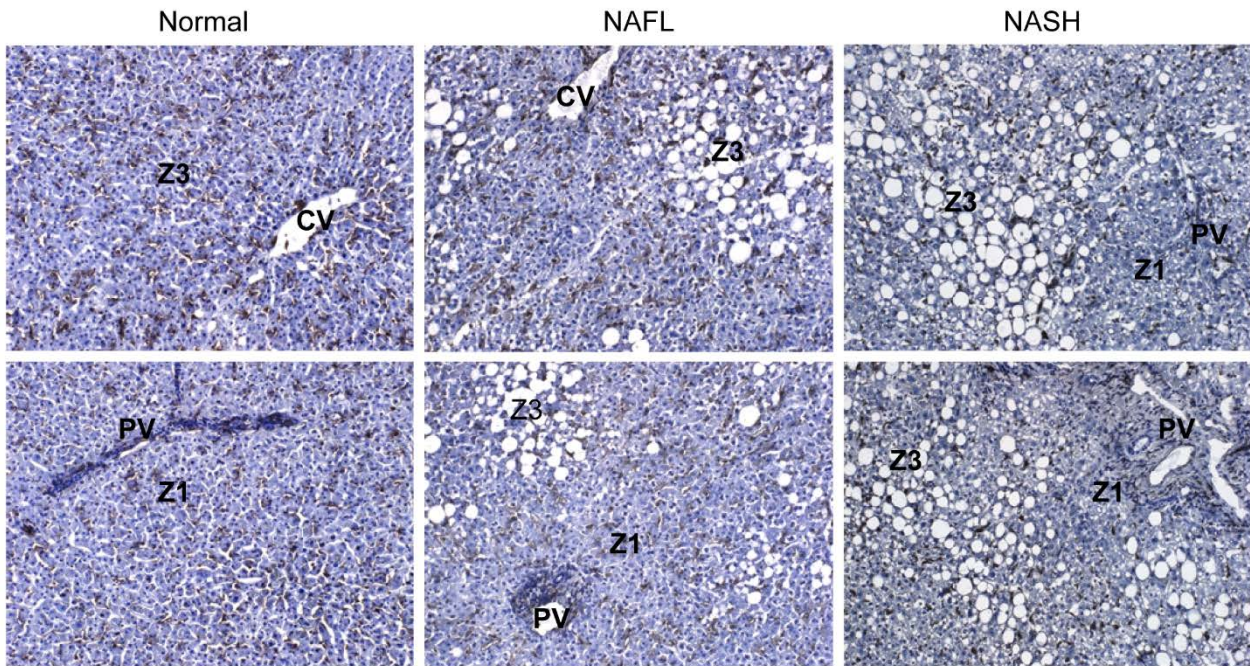

**Figure S10. Immunostaining for CD68 positive cells in human liver.** CD68 positive cells (marker for macrophages including Kupffer cells) appear to be distributed azonally in human normal and NAFL liver. In human NASH, there appears to be increased staining (brown) around lipid droplets in the steatotic regions (zone 3).

## LPCAT2 staining in human NASH

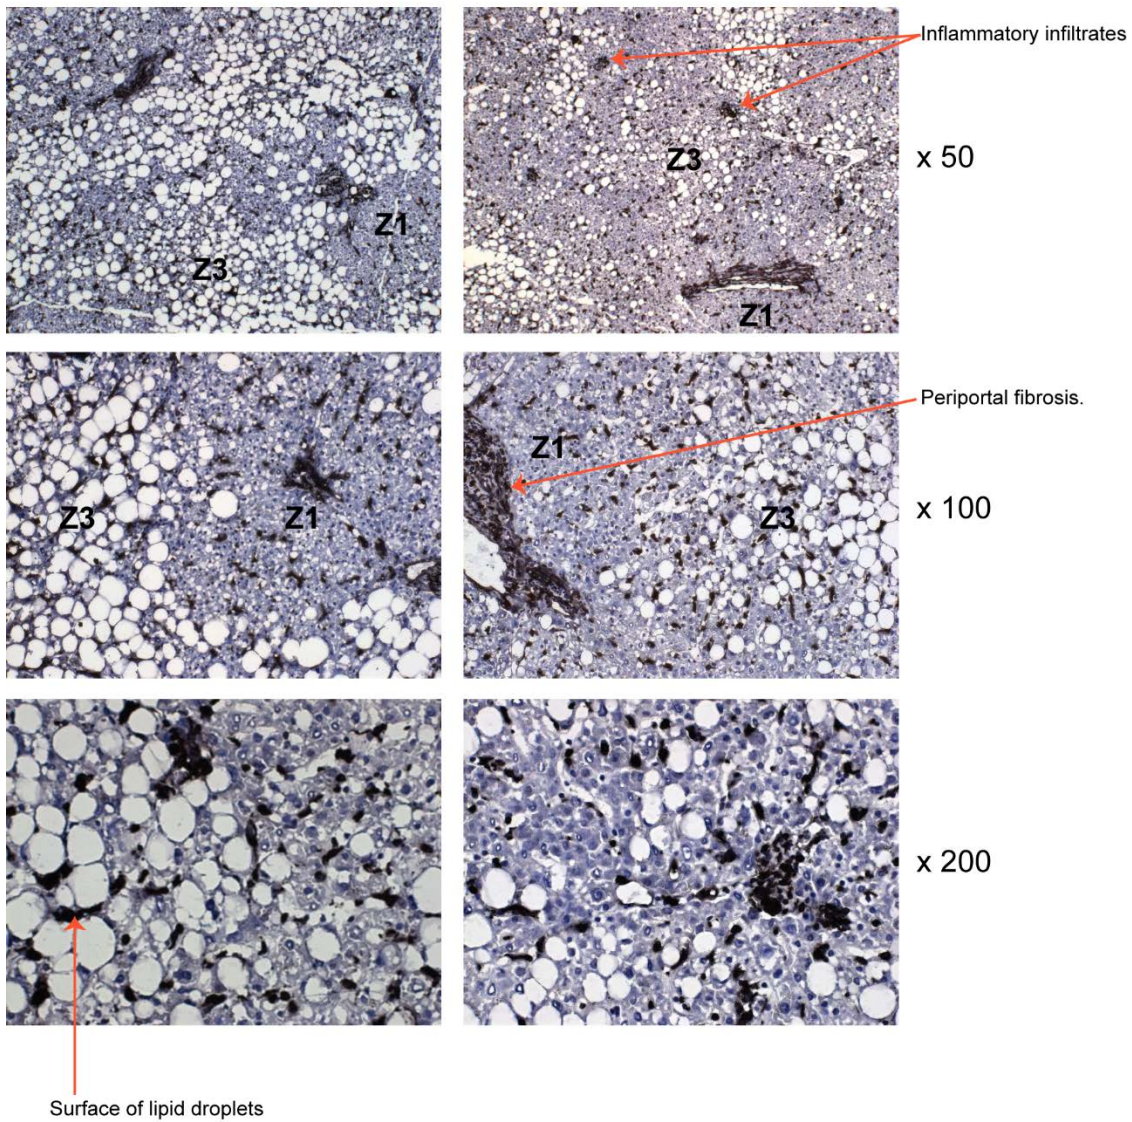

**Figure S11. LPCAT2 staining in human NASH.** LPCAT2 staining in human NASH appears to be associated with the surface of lipid droplets (mainly Z3), as well as inflammatory infiltrates, and areas of periportal fibrosis.

LPCAT2 staining in Western diet mouse model of NASH

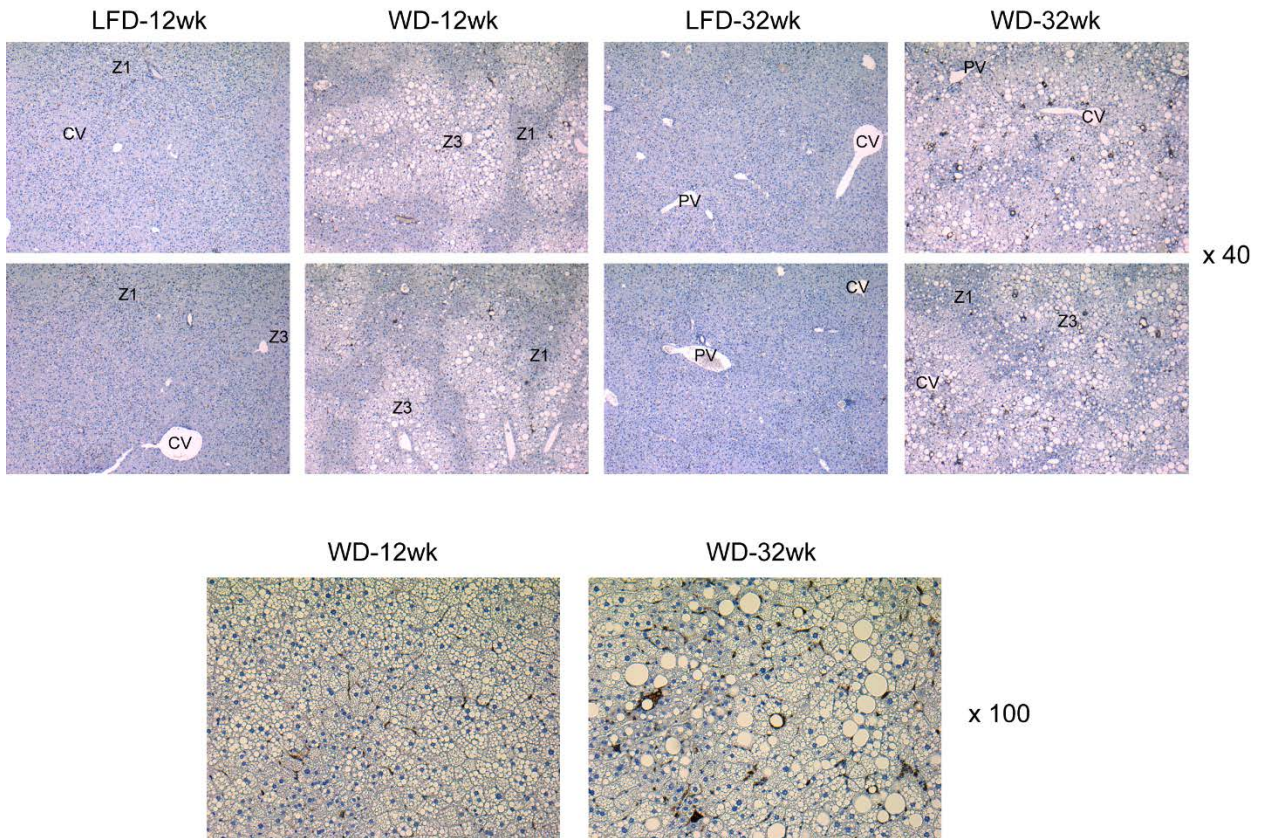

**Figure S12. LPCAT2 staining in a mouse model of NASH.** LPCAT2 staining in low fat diet (LFD) control mice (12 and 32 weeks) and 12 week Western diet (WD) mice was weak, mainly associated with Kupffer cells, showing a periportal pattern of zonation (similar to that noted for WT mice on regular chow or high fat diets). However, mice on WD for 32 weeks with NASH had dramatically increased staining for LPCAT2, which was often associated with the surface of lipid droplets (as noted in human NASH).

**Table S1.** Chromatography gradient composition for lipidomics open profiling

| Time (min) | Mobile Phase A (%) | Mobile Phase B (%) |
|------------|--------------------|--------------------|
| 0          | 60                 | 40                 |
| 0.8        | 57                 | 43                 |
| 0.9        | 50                 | 50                 |
| 4.8        | 46                 | 54                 |
| 4.9        | 30                 | 70                 |
| 5.8        | 19                 | 81                 |
| 8          | 1                  | 99                 |
| 8.5        | 1                  | 99                 |
| 8.6        | 60                 | 40                 |
| 10         | 60                 | 40                 |

**Table S2.** Chromatography gradient composition for targeted eicosanoid analysis

| Time (min) | B (%) | Time (min) | B (%) |
|------------|-------|------------|-------|
| 0.0        | 15    | 5.6        | 60    |
| 0.4        | 15    | 8          | 70    |
| 0.8        | 30    | 8.5        | 80    |
| 1.9        | 47    | 10.1       | 100   |
| 2.7        | 54    | 10.3       | 15    |
| 3.2        | 55    | 12         | 15    |

**Table S3. MRM transitions and retention times for eicosanoids.** Mass transitions (Q1/Q3), collision energies (CE) in volts and retention times (RTs) in minutes of eicosanoid analytes measured.

| Eicosanoid   | Q1    | Q3    | RT   | CE  | Eicosanoid     | Q1    | Q3    | RT   | CE  |
|--------------|-------|-------|------|-----|----------------|-------|-------|------|-----|
| 13-HODE      | 295.0 | 195.0 | 6.72 | -24 | PGJ2           | 333.0 | 233.0 | 3.52 | -16 |
| 12(13)-EpOME | 295.1 | 195.1 | 8.22 | -22 | 12-oxoLTB4     | 333.0 | 179.0 | 4.59 | -18 |
| 9-HODE       | 295.1 | 171.1 | 6.75 | -26 | PGB2           | 333.0 | 235.0 | 3.53 | -26 |
| 9(10)-EpOME  | 295.1 | 171.1 | 8.34 | -24 | 12-HpETE       | 335.0 | 273.0 | 7.46 | -12 |
| 9,10-DHOME   | 313.1 | 201.0 | 4.62 | -28 | LTB4           | 335.1 | 195.0 | 4.04 | -22 |
| 12,13-DiHoME | 314.1 | 129.0 | 4.47 | -30 | 15-HpETE       | 335.1 | 113.0 | 7.47 | -14 |
| 15d-PGJ2     | 315.0 | 271.0 | 5.88 | -20 | 11,12-DHET     | 337.0 | 145.0 | 5.19 | -26 |
| 15-oxo-EETE  | 317.0 | 273.0 | 7.43 | -20 | 8,9-DHET       | 337.1 | 127.1 | 5.47 | -28 |
| 12-oxo-EETE  | 317.0 | 153.0 | 8.1  | -22 | 5,6-DHET       | 337.1 | 145.0 | 5.91 | -24 |
| 12-HEPE      | 317.1 | 179.1 | 6.32 | -20 | 14,15-DHET     | 337.1 | 126.9 | 4.85 | -28 |
| 8-HEPE       | 317.1 | 155.1 | 6.22 | -18 | 13-HDoHE       | 343.0 | 193.0 | 7.37 | -16 |
| 5-HEPE       | 317.1 | 115.1 | 6.57 | -18 | 17-HDoHE       | 343.1 | 201.2 | 7.28 | -20 |
| 15-HEPE      | 317.1 | 219.1 | 6.06 | -18 | 7-HDoHE        | 343.1 | 281.4 | 7.69 | -18 |
| 8,9-EET      | 319.0 | 167.0 | 8.72 | -18 | PGE2           | 351.1 | 271.1 | 2.93 | -24 |
| 5,6-EET      | 319.0 | 163.0 | 8.83 | -20 | PGD2           | 351.1 | 189.0 | 2.87 | -28 |
| 20-HETE      | 319.0 | 275.0 | 6.14 | -22 | PGF2a          | 353.0 | 113.0 | 2.72 | -34 |
| 15-HETE      | 319.0 | 219.0 | 7.07 | -18 | PGD1           | 353.1 | 317.0 | 2.9  | -18 |
| 5-HETE       | 319.0 | 115.0 | 7.89 | -18 | PGE1           | 353.1 | 112.9 | 2.71 | -32 |
| 11,12-EET    | 319.1 | 167.2 | 8.61 | -20 | 8-iso-PGF2a    | 353.1 | 193.2 | 2.45 | -36 |
| 8-HETE       | 319.1 | 301.2 | 7.54 | -18 | 10,17 DiHDoHE  | 359.1 | 153.0 | 4.08 | -22 |
| 11-HETE      | 319.1 | 167.1 | 7.35 | -22 | 6-keto-PGF1a   | 369.1 | 163.1 | 2    | -38 |
| 14,15-EET    | 319.1 | 219.2 | 8.23 | -18 | TxB2           | 369.1 | 169.0 | 2.48 | -24 |
| 9-HETE       | 319.1 | 151.0 | 7.71 | -20 | PGD2-EA        | 394.5 | 276.0 | 2.3  | -14 |
| 14(15)EpETE  | 319.1 | 113.0 | 8.2  | -22 | LTD4           | 494.8 | 177.0 | 3.08 | -28 |
| 12-HETE      | 319.2 | 179.2 | 7.54 | -20 | 12-HETE-d8     | 327.0 | 184.0 | 7.47 | -22 |
| 15-oxoEDE    | 321.1 | 113.1 | 8.64 | -30 | PGE2-d4        | 355.3 | 275.3 | 2.76 | -28 |
| 15-HETrE     | 321.1 | 303.1 | 7.97 | -20 | 8-iso-PGF2a-d4 | 357.2 | 197.4 | 2.45 | -34 |

**Abbreviations:** dihydroyeicosatrienoic acid (DHET), dihydroxyoctadecaenoic acid (DiHOME), epoxyeicosatrienoic acid (EET), epoxyeicosatetraenoic acid (EpETE), epoxyoctadecaenoic acid (EpOME), hydroxydocosahexaenoic acid (HDoHE), hydroxyeicosatrienoic acid (HETrE), hydroxyeicosapentaenoic acid (HEPE), hydroxyeicosatetraenoic acid (HETE), hydroxyoctadecadienoic acid (HODE), hydroperoxyeicosatetraenoic acid (HpETE), leukotriene (LT), oxoeicosatetraenoic acid (oxo-EETE), oxoeicosadienoic acid (oxoEDE), prostaglandin (PG), thromboxane (TX).

**Table S4.** Total fatty acid content (relative %) measured by GC-MS for the two mouse studies and their feeds, and the clinical samples. Total saturated fatty acids (SFA), monounsaturated fatty acids (MUFA) and polyunsaturated fatty acids (PUFA) are given for each group along with the SCD1 ratio (3): (18:0+16:0/18:1+16:1).

| Lipid species | High fat diet mouse study |          |       |          |          |          | Western diet mouse study |          |         |         |             | Human study |            |       |
|---------------|---------------------------|----------|-------|----------|----------|----------|--------------------------|----------|---------|---------|-------------|-------------|------------|-------|
|               | WT-RC                     | ob/ob-RC | WT-HF | ob/ob-HF | RCD feed | HFD feed | LFD-12wk                 | LFD-32wk | WD-12wk | WD-32wk | WD/LFD feed | NAFL        | Borderline | NASH  |
| 12:0          | 0.0                       | 0.0      | 0.2   | 0.1      | 0.0      | 7.7      | 0.2                      | 0.1      | 0.1     | 0.1     | 3.3         | 0.4         | 0.4        | 0.4   |
| 13:0          | 0.0                       | 0.0      | 0.0   | 0.0      | 0.0      | 0.0      | 0.1                      | 0.0      | 0.0     | 0.0     | 0.0         | 0.5         | 0.2        | 0.2   |
| 14:0          | 0.4                       | 0.7      | 0.6   | 0.9      | 0.6      | 4.0      | 0.8                      | 1.1      | 1.6     | 1.7     | 10.6        | 1.9         | 2.6        | 3.1   |
| 15:0          | 0.2                       | 0.1      | 0.2   | 0.1      | 0.1      | 0.1      | 0.2                      | 0.2      | 0.4     | 0.3     | 0.0         | 0.2         | 0.3        | 0.4   |
| 16:0          | 30.8                      | 29.1     | 20.3  | 22.9     | 16.6     | 13.4     | 29.0                     | 27.9     | 28.3    | 26.4    | 28.9        | 27.1        | 30.2       | 29.6  |
| 16:1          | 2.8                       | 4.5      | 0.7   | 3.1      | 0.6      | 0.2      | 6.8                      | 6.5      | 11.6    | 10.0    | 1.5         | 3.3         | 5.2        | 3.9   |
| 17:0          | 0.3                       | 0.1      | 0.4   | 0.2      | 0.1      | 0.1      | 0.2                      | 0.2      | 0.2     | 0.2     | 0.0         | 0.3         | 0.3        | 0.4   |
| 17:1          | 0.2                       | 0.2      | 0.2   | 0.1      | 0.1      | 0.1      | 0.4                      | 0.4      | 1.0     | 0.9     | 0.0         | 0.4         | 0.4        | 0.4   |
| 18:0          | 11.3                      | 3.5      | 11.9  | 3.1      | 3.2      | 5.9      | 8.5                      | 6.0      | 2.8     | 2.2     | 12.5        | 12.5        | 8.7        | 7.9   |
| 18:1          | 14.0                      | 49.3     | 16.2  | 35.7     | 19.3     | 29.4     | 28.9                     | 41.8     | 45.1    | 50.9    | 24.9        | 29.1        | 31.9       | 34.9  |
| 18:2 trans    | 0.1                       | 0.3      | 0.1   | 0.1      | 0.1      | 0.0      | 0.3                      | 0.3      | 0.4     | 0.1     | 1.3         | 0.3         | 0.3        | 0.3   |
| 18:2 cis      | 20.2                      | 6.2      | 28.6  | 23.6     | 51.4     | 34.9     | 9.7                      | 6.2      | 3.6     | 2.5     | 2.3         | 11.9        | 10.8       | 11.7  |
| 18:3 n6       | 0.3                       | 0.1      | 0.8   | 0.5      | 0.3      | 0.2      | 0.3                      | 0.2      | 0.2     | 0.2     | 0.7         | 0.4         | 0.4        | 0.5   |
| 18:3 n3       | 0.5                       | 0.3      | 1.3   | 1.1      | 4.9      | 3.5      | 0.2                      | 0.2      | 0.1     | 0.1     | 0.0         | 0.7         | 0.8        | 0.9   |
| 20:1          | 0.4                       | 1.4      | 0.6   | 0.9      | 0.7      | 0.2      | 0.7                      | 1.1      | 1.4     | 2.0     | 0.0         | 1.8         | 1.0        | 0.8   |
| 20:2          | 0.3                       | 0.1      | 0.4   | 0.5      | 0.1      | 0.0      | 0.2                      | 0.3      | 0.1     | 0.2     | 0.0         | 0.2         | 0.2        | 0.1   |
| 20:3 n6       | 1.2                       | 0.6      | 1.3   | 1.7      | 0.1      | 0.0      | 1.3                      | 0.7      | 0.5     | 0.3     | 0.0         | 1.0         | 0.6        | 0.4   |
| 20:4 n6       | 7.7                       | 1.4      | 9.8   | 2.9      | 0.1      | 0.0      | 7.4                      | 4.1      | 1.4     | 0.9     | 0.0         | 3.7         | 2.9        | 1.9   |
| 20:5 n3       | 0.8                       | 0.2      | 0.4   | 0.3      | 0.5      | 0.0      | 0.6                      | 0.3      | 0.4     | 0.4     | 0.0         | 2.8         | 1.4        | 1.1   |
| 22:6 3        | 8.4                       | 1.7      | 6.0   | 2.2      | 1.0      | 0.0      | 4.2                      | 2.5      | 0.8     | 0.6     | 0.0         | 1.5         | 1.4        | 1.0   |
| SFA           | 42.75                     | 33.45    | 33.18 | 27.13    | 20.65    | 31.16    | 38.76                    | 35.35    | 33.19   | 30.77   | 61.80       | 42.66       | 42.31      | 41.55 |
| MUFA          | 17.68                     | 55.61    | 18.12 | 39.95    | 20.75    | 29.99    | 37.03                    | 49.95    | 59.31   | 64.08   | 27.30       | 34.95       | 38.84      | 40.59 |
| PUFA          | 39.11                     | 10.46    | 48.17 | 32.26    | 58.31    | 38.76    | 23.71                    | 14.19    | 7.00    | 4.82    | 4.70        | 21.96       | 18.36      | 17.46 |
| SCD1 ratio    | 0.40                      | 1.65     | 0.53  | 1.49     |          |          | 0.95                     | 1.42     | 1.83    | 2.13    |             | 0.82        | 0.95       | 1.04  |



**Table S5.** Identification of lipid species detected in mouse and human liver tissue by MALDI-MSI.

| Lipid species | m/z (K+) | m/z (Li+) | Exact mass (K+) | Exact mass (Li+) | ppm (K+) | ppm (Li+) | Fatty acid composition     | Confirmed by MS/MS | Diagnostic fragment ions (Li+ precursor) |                                     |                            |          |
|---------------|----------|-----------|-----------------|------------------|----------|-----------|----------------------------|--------------------|------------------------------------------|-------------------------------------|----------------------------|----------|
|               |          |           |                 |                  |          |           |                            |                    | Loss of FA (H+)                          | Loss of FA (Li+)                    | Loss of N(Me) <sub>3</sub> | DAG (H+) |
| PC 32:0       | 772.523  | 740.574   | 772.5253        | 740.5776         | 3.2      | 4.7       | 16:0/16:0                  | Yes                | 478.3                                    | 484.3                               | 681.5                      | 557.5    |
| PC 32:1       | 770.507  | 738.562   | 770.5097        | 738.562          | 3.1      | 0.1       | 16:0/16:1                  | Yes                | 478.3                                    | 484.3                               | 679.5                      | 555.5    |
| PC 34:1       | 798.538  | 766.590   | 798.541         | 766.5933         | 3.9      | 4.8       | 16:0/18:1                  | Yes                | 478.3,<br>504.3                          | 484.3,<br>510.3                     | 707.5                      | 577.5    |
| PC 34:2       | 796.522  | 764.574   | 796.5253        | 764.5776         | 4.0      | 5.0       | 16:0/18:2                  | Yes                | 478.3,<br>502.3                          | 484.3,<br>508.3                     | 705.5                      | 575.5    |
| PC 34:3       | 794.508  | 762.562   | 794.5097        | 762.562          | 2.3      | 0.1       | 16:1/18:2                  |                    |                                          |                                     |                            |          |
| PC 36:1       | 826.574  | 794.628   | 826.5723        | 794.6246         | -1.5     | -4.2      | 18:0/18:1                  | Yes                | 506.3                                    | 512.3,<br>510.3                     | 735.5                      | 611.5    |
| PC 36:2       | 824.553  | 792.605   | 824.5566        | 792.6089         | 4.1      | 4.8       | 18:1/18:1 and<br>18:0/18:2 | Yes                | 502.3,<br>504.3,<br>506.3                | 508.3,<br>510.3,<br>512.3           | 733.5                      | 609.5    |
| PC 36:3       | 822.538  | 790.590   | 822.541         | 790.5933         | 3.6      | 4.4       | 16:0/20:3 and<br>18:2/18:1 | Yes                | 478.3,<br>502.3,<br>504.3,<br>528.3      | 484.3,<br>508.3,<br>510.3,<br>534.3 | 731.5                      | 607.5    |
| PC 36:4       | 820.522  | 788.574   | 820.5253        | 788.5776         | 4.0      | 5.1       | 16:0/20:4                  | Yes                | 478.3,<br>526.3                          | 484.3,<br>532.3                     | 729.5                      | 605.5    |
| PC 38:3       | 850.571  | 818.627   | 850.5723        | 818.6246         | 1.4      | -3.1      | 18:0/20:3                  |                    |                                          |                                     |                            |          |
| PC 38:4       | 848.553  | 816.605   | 848.5566        | 816.6089         | 4.1      | 4.8       | 18:0/20:4                  | Yes                | 506.4,<br>526.3                          | 512.4,<br>532.3                     | 757.5                      | 633.5    |
| PC 38:6       | 844.522  | 812.574   | 844.5253        | 812.5776         | 4.3      | 5.0       | 16:0/22:6                  | Yes                | 478.3,<br>550.3                          | 484.3,<br>556.3                     | 753.3                      | 629.5    |
| PC 40:6       | 872.553  | 840.605   | 872.5566        | 840.6089         | 4.1      | 4.8       | 18:0/22:6                  | Yes                | 506.3,<br>550.3                          | 512.4,<br>556.3                     | 781.5                      | 657.5    |
| PC 40:7       | 870.537  | 838.589   | 870.5410        | 838.5933         | 4.3      | 5.1       | 18:1/22:6                  | Yes                | 504.3,<br>550.3                          | 510.4,<br>556.3                     | 779.5                      | 655.5    |
| LysoPC16      | 534.294  | 502.346   | 534.2956        | 502.3479         | 3.4      | 4.0       | 16:0                       |                    |                                          |                                     | 443.3                      |          |
| SM 34:1       | 741.529  | 709.583   | 741.5307        | 709.583          | 2.0      | -0.3      |                            | Yes                |                                          |                                     | 650.6                      | 526.6    |
| SM 36:2       | 767.552  | 735.605   | 767.5464        | 735.5987         | -7.4     | -8.8      |                            | Yes                |                                          |                                     | 676.6                      | 552.6    |
| SM 40:1       | 825.622  | 793.677   | 825.6246        | 793.6769         | 2.7      | -0.4      |                            | Yes                |                                          |                                     | 734.7                      | 610.7    |
| SM 42:2       | 851.638  | 819.693   | 851.6403        | 819.6926         | 2.5      | -0.2      |                            | Yes                |                                          |                                     | 760.7                      | 636.7    |
|               |          |           |                 |                  |          |           |                            |                    |                                          |                                     |                            |          |

**Table S5. cntd.**

| Lipid species | <i>m/z</i> (K+) | <i>m/z</i> (Li+) | Exact mass (K+) | Exact mass (Li+) | ppm (K+) | ppm (Li+) | Major FA composition | Confirmed by MS/MS | Diagnostic fragment ions (Li+ precursor) |                     |
|---------------|-----------------|------------------|-----------------|------------------|----------|-----------|----------------------|--------------------|------------------------------------------|---------------------|
|               |                 |                  |                 |                  |          |           |                      |                    | DAG (H+)                                 | DAG (Li+)           |
| TG 50:2       | 869.697         | ND               | 869.6995        | 837.7518         | 2.6      |           |                      |                    |                                          |                     |
| TG 52:2       | 897.729         | 865.780          | 897.7308        | 865.7831         | 2.1      | 3.3       | 16:0/18:1/18:1       | Yes                | 577.5, 603.5                             | 583.5, 609.5        |
| TG 52:3       | 895.713         | 863.765          | 895.7151        | 863.7674         | 2.6      | 3.2       | 16:0/18:1/18:2       | Yes                | 577.5, 575.5, 601.5                      | 583.5, 581.5, 607.5 |
| TG 52:4       | 893.697         | 861.750          | 893.6995        | 861.7518         | 3.4      | 2.4       |                      |                    |                                          |                     |
| TG 54:2       | 925.764         | ND               | 925.7621        | 893.8144         | -1.5     |           |                      |                    |                                          |                     |
| TG 54:3       | 923.744         | 891.797          | 923.7464        | 891.7987         | 2.3      | 2.5       | 18:1/18:1/18:1       | Yes                | 603.5                                    | 609.5               |
| TG 54:4       | 921.728         | 889.781          | 921.7308        | 889.7831         | 2.7      | 2.6       | 18:1/18:1/18:2       | Yes                | 601.5, 603.5                             | 607.5, 609.5        |
| TG 54:5       | 919.712         | 887.766          | 919.7151        | 887.7674         | 3.9      | 1.7       |                      |                    |                                          |                     |
| TG 54:6       | 917.696         | ND               | 917.6995        | 885.7518         | 4.4      |           |                      |                    |                                          |                     |

**Table S6. Commonly observed measurement induced fragments**

| Lipid   | Intact species (K+) | Loss of N(Me) <sub>3</sub> |
|---------|---------------------|----------------------------|
| PC 32:0 | 772.523             | 713.449                    |
| PC 32:1 | 770.507             | 711.433                    |
| PC 34:1 | 798.538             | 739.464                    |
| PC 34:2 | 796.522             | 737.448                    |
| PC 34:3 | 794.508             | 735.434                    |
| PC 36:1 | 826.574             | 767.500                    |
| PC 36:2 | 824.553             | 765.479                    |
| PC 36:3 | 822.538             | 763.464                    |
| PC 36:4 | 820.522             | 761.448                    |
| PC 38:4 | 848.553             | 789.479                    |
| PC 38:6 | 844.522             | 785.448                    |
| SM 34:1 | 741.529             | 682.455                    |
| SM 40:1 | 825.622             | 766.548                    |
| SM 42:2 | 851.638             | 792.564                    |

## Supplementary References

1. Jha P, Knopf A, Koefeler H, Mueller M, Lackner C, Hoefler G, Claudel T, et al. Role of adipose tissue in methionine–choline-deficient model of non-alcoholic steatohepatitis (NASH). *Biochimica et Biophysica Acta (BBA) - Molecular Basis of Disease* 2014;1842:959-970.
2. Wiklund S, Johansson E, Sjöström L, Mellerowicz EJ, Edlund U, Shockcor JP, Gottfries J, et al. Visualization of GC/TOF-MS-Based Metabolomics Data for Identification of Biochemically Interesting Compounds Using OPLS Class Models. *Analytical Chemistry* 2008;80:115-122.
3. Yew Tan C, Virtue S, Murfitt S, Roberts LD, Phua YH, Dale M, Griffin JL, et al. Adipose tissue fatty acid chain length and mono-unsaturation increases with obesity and insulin resistance. *Scientific Reports* 2015;5:18366.
